# Supplementary material
Source: MDPI journal article supplement (https://www.mdpi.com/2073-4352/11/5/565)
Supplement: s1 [file s1]

# Some new synthesized of 1-N-(substituted)- azacoumarin- 3-carboxylic acid derivatives functioning as anti-cancer drugs

Ahmed Gaber<sup>1,2</sup>, Walaa F. Alsanie<sup>2,3</sup>, Majid Alhomrani<sup>2,3</sup>, Abdulhakeem S. Alamri<sup>2,3</sup>, Ibrahim M. El-Deen<sup>4</sup>, and Moamen S. Refat<sup>5,\*</sup>

<sup>1</sup> Department of Biology, College of Science, Taif University, P.O. Box 11099, Taif 21944, Saudi Arabia; [a.gaber@tu.edu.sa](mailto:a.gaber@tu.edu.sa) (A.G.)

<sup>2</sup> Center of Biomedical Sciences Research (CBSR), Taif University, P.O. Box 11099, Taif 21944, Saudi Arabia; [a.gaber@tu.edu.sa](mailto:a.gaber@tu.edu.sa) (A.G.); [w.alsanie@tu.edu.sa](mailto:w.alsanie@tu.edu.sa) (W.F.A.); [m.alhomrani@tu.edu.sa](mailto:m.alhomrani@tu.edu.sa) (M.A.); [a.alamri@tu.edu.sa](mailto:a.alamri@tu.edu.sa) (A.S.A.)

<sup>3</sup> Department of Clinical Laboratories Sciences, The Faculty of Applied Medical Sciences, Taif University, P.O. Box 11099, Taif 21944, Saudi Arabia; [w.alsanie@tu.edu.sa](mailto:w.alsanie@tu.edu.sa) (W.F.A.); [m.alhomrani@tu.edu.sa](mailto:m.alhomrani@tu.edu.sa) (M.A.); [a.alamri@tu.edu.sa](mailto:a.alamri@tu.edu.sa) (A.S.A.)

<sup>4</sup> Department of Chemistry, Faculty of Science, Port Said University, Port Said 42511, Egypt; [ildeen@yahoo.com](mailto:ildeen@yahoo.com) (I.M.E)

<sup>5</sup> Department of Chemistry, College of Science, Taif University, P.O. Box 11099, Taif 21944, Saudi Arabia; [moamen@tu.edu.sa](mailto:moamen@tu.edu.sa) (M.S.R.)

\* Correspondence: [moamen@tu.edu.sa](mailto:moamen@tu.edu.sa)

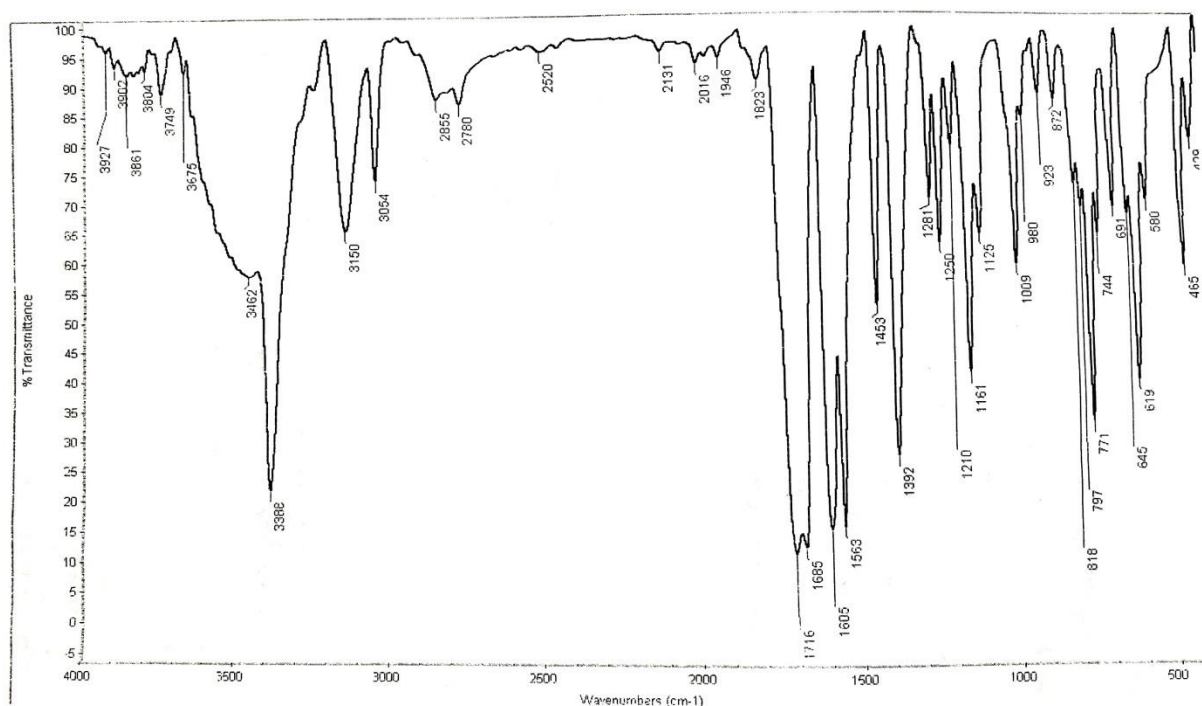

Figure S1: FT-IR spectrum of compound (3)

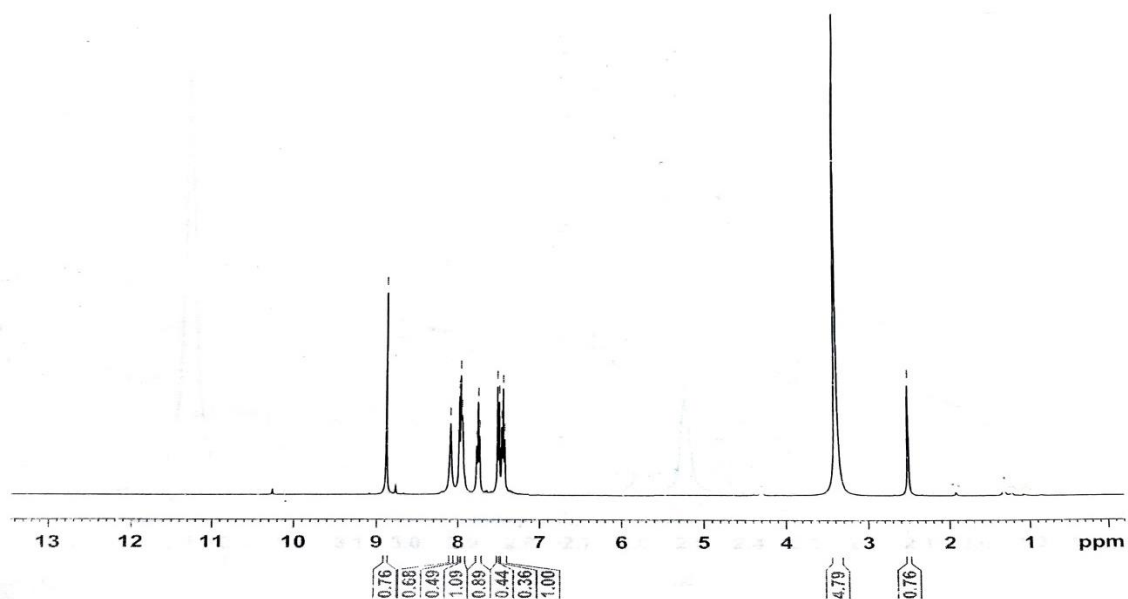

Figure S2:  $^1\text{H}$ -NMR spectrum of compound (3)

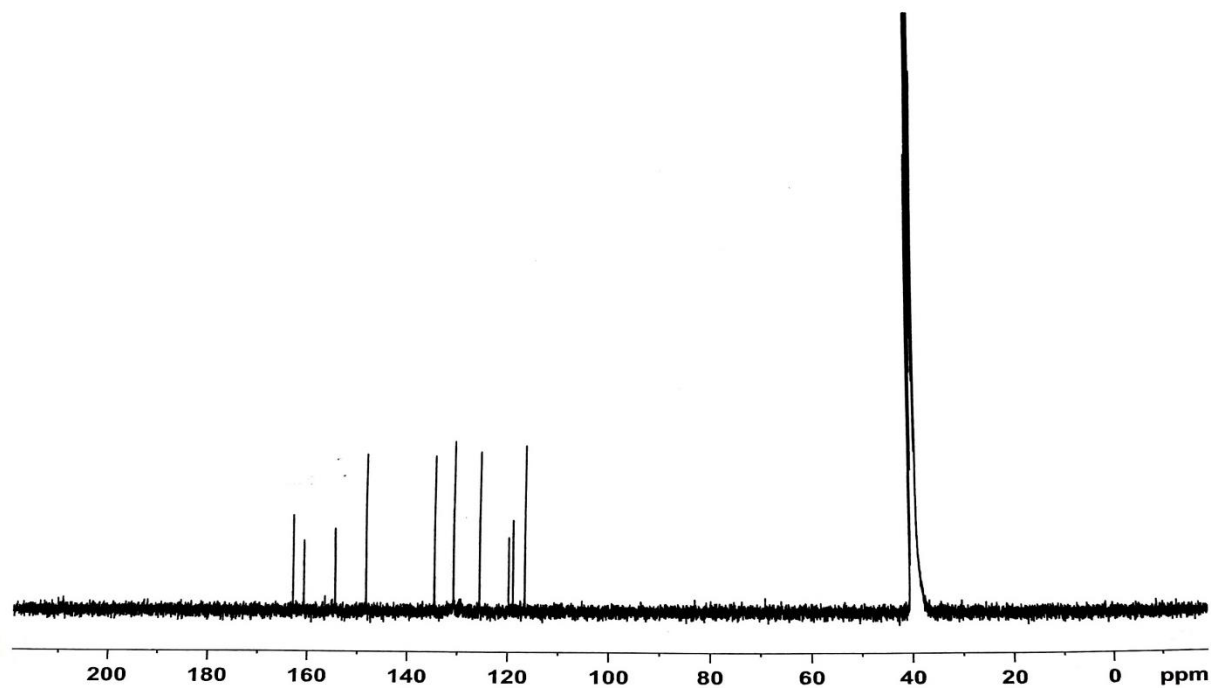

Figure S3:  $^{13}\text{C}$ -NMR spectrum of compound (3)

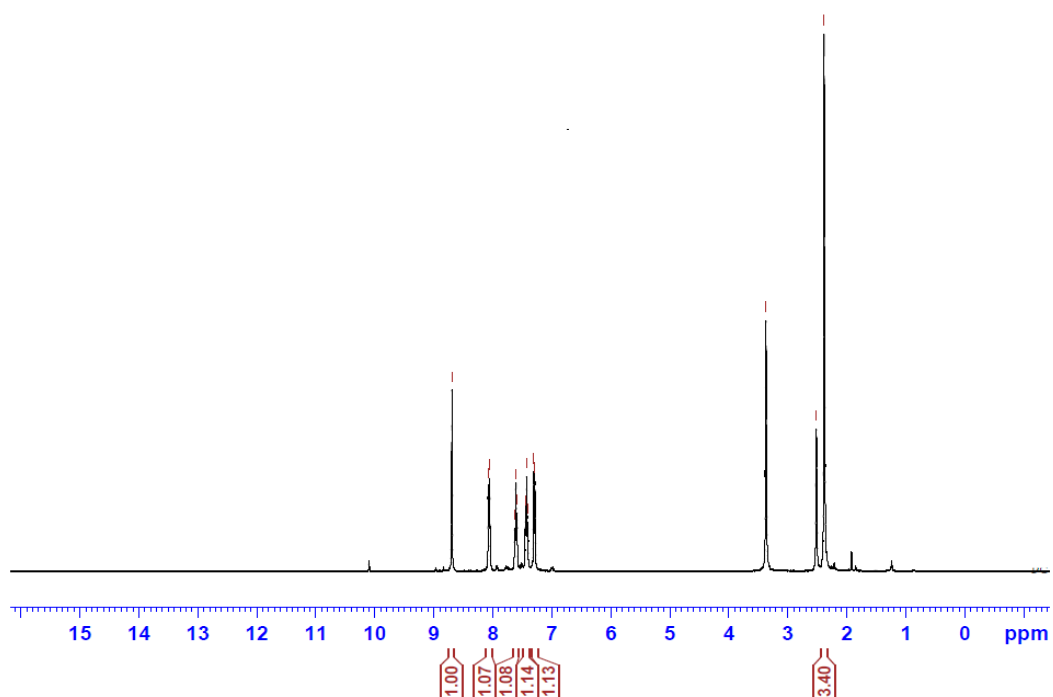

Figure S4:  $^1\text{H}$ -NMR spectrum of compound (4)

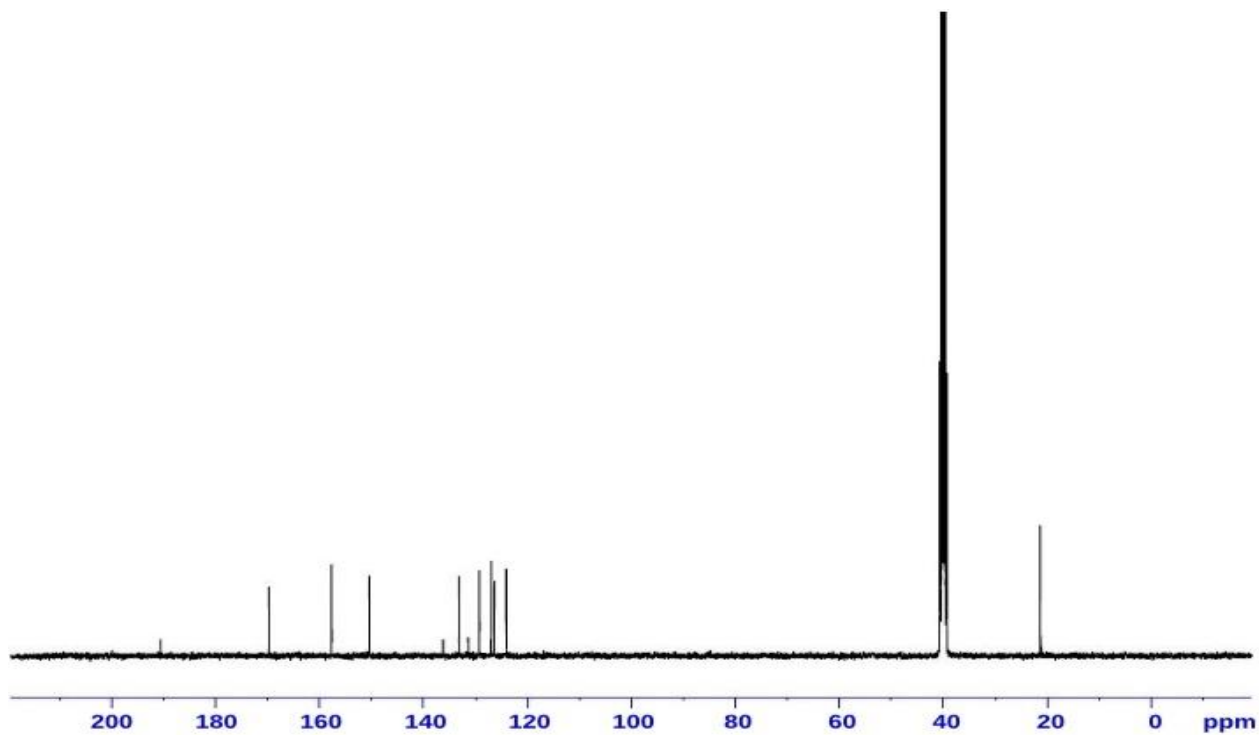

Figure S5:  $^{13}\text{C}$ -NMR spectrum of compound (4)

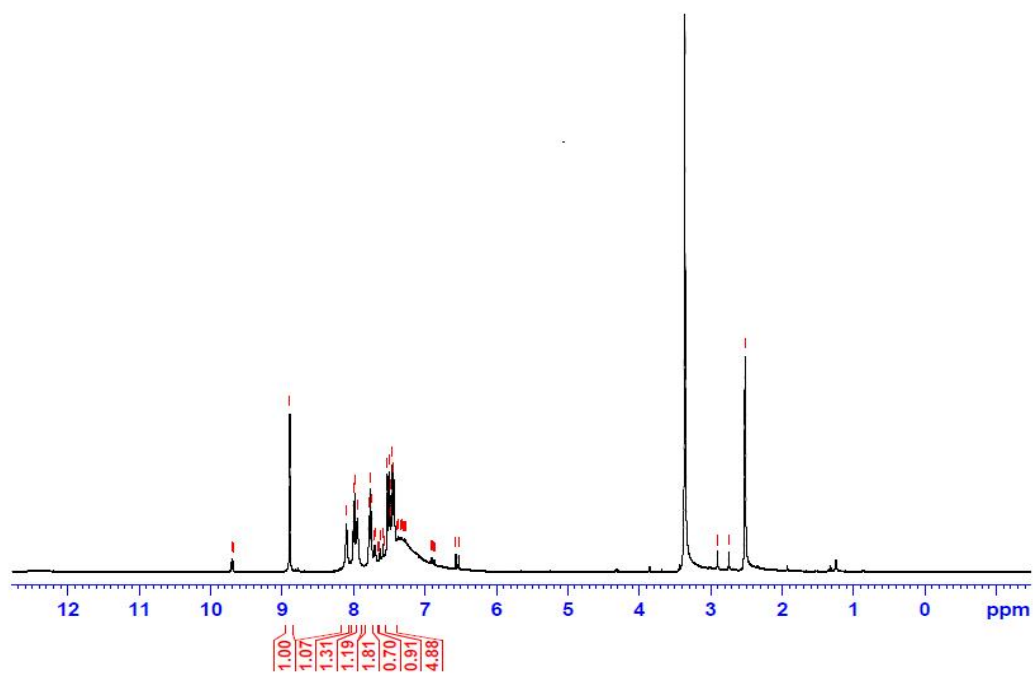

Figure S6:  $^1\text{H}$ -NMR spectrum of compound (5)

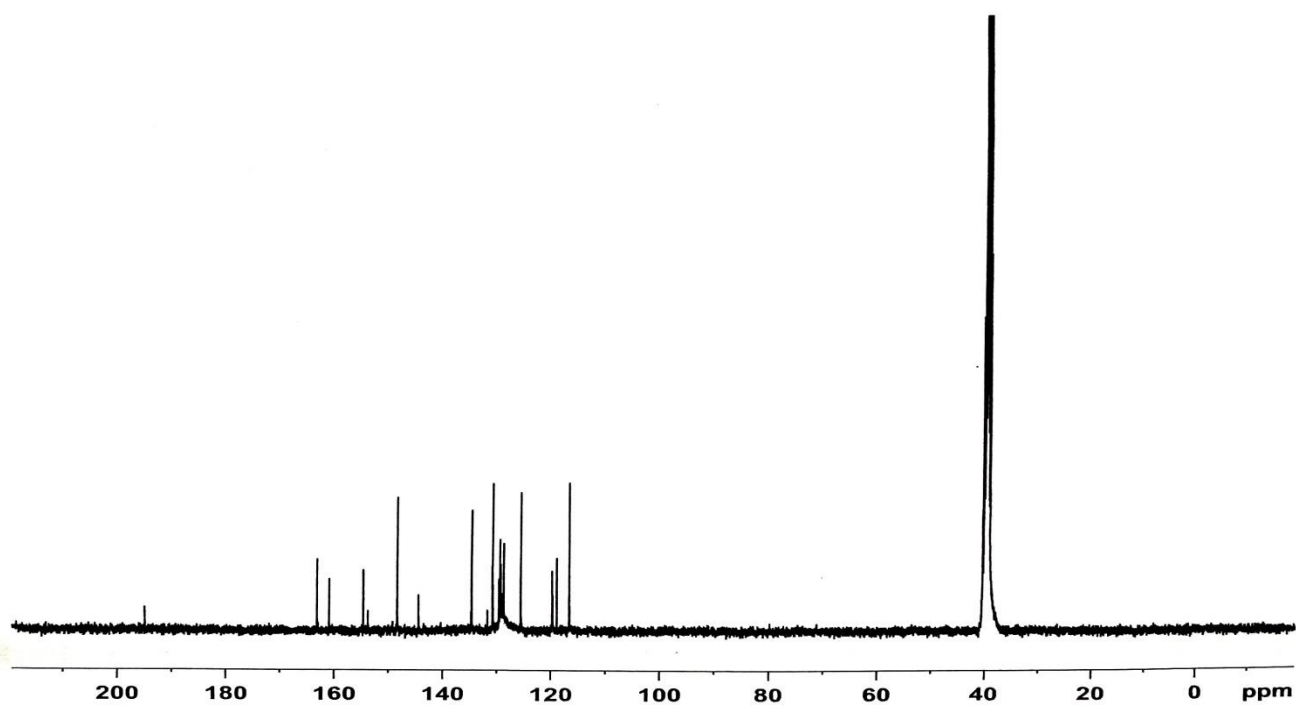

Figure S7:  $^{13}\text{C}$ -NMR spectrum of compound (5)

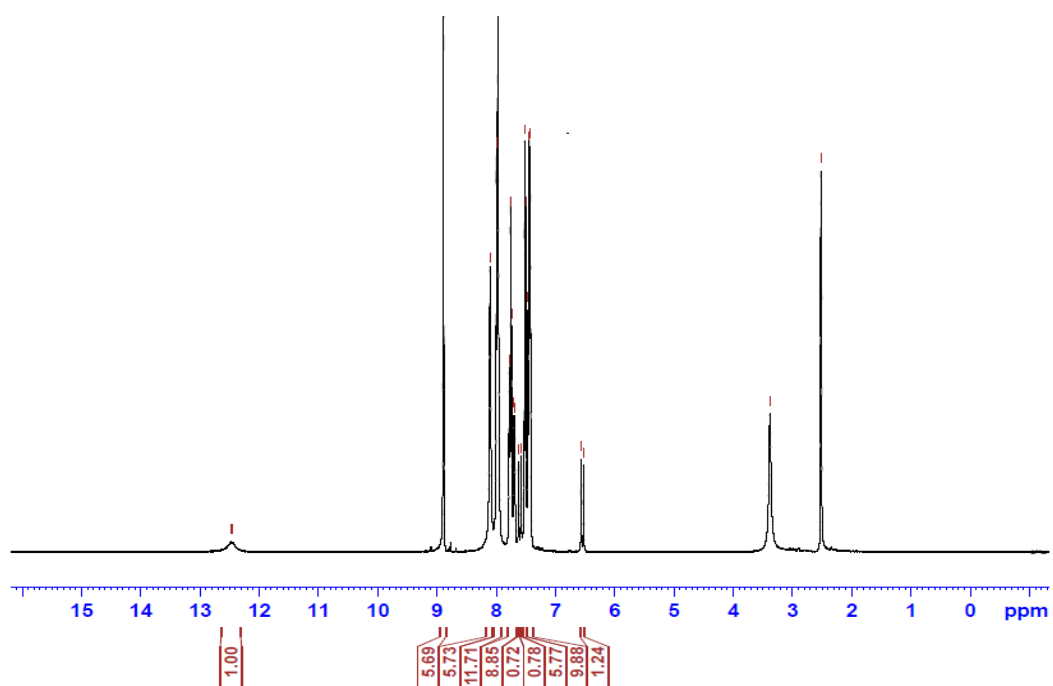

Figure S8:  $^1\text{H}$ -NMR spectrum of compound (6)

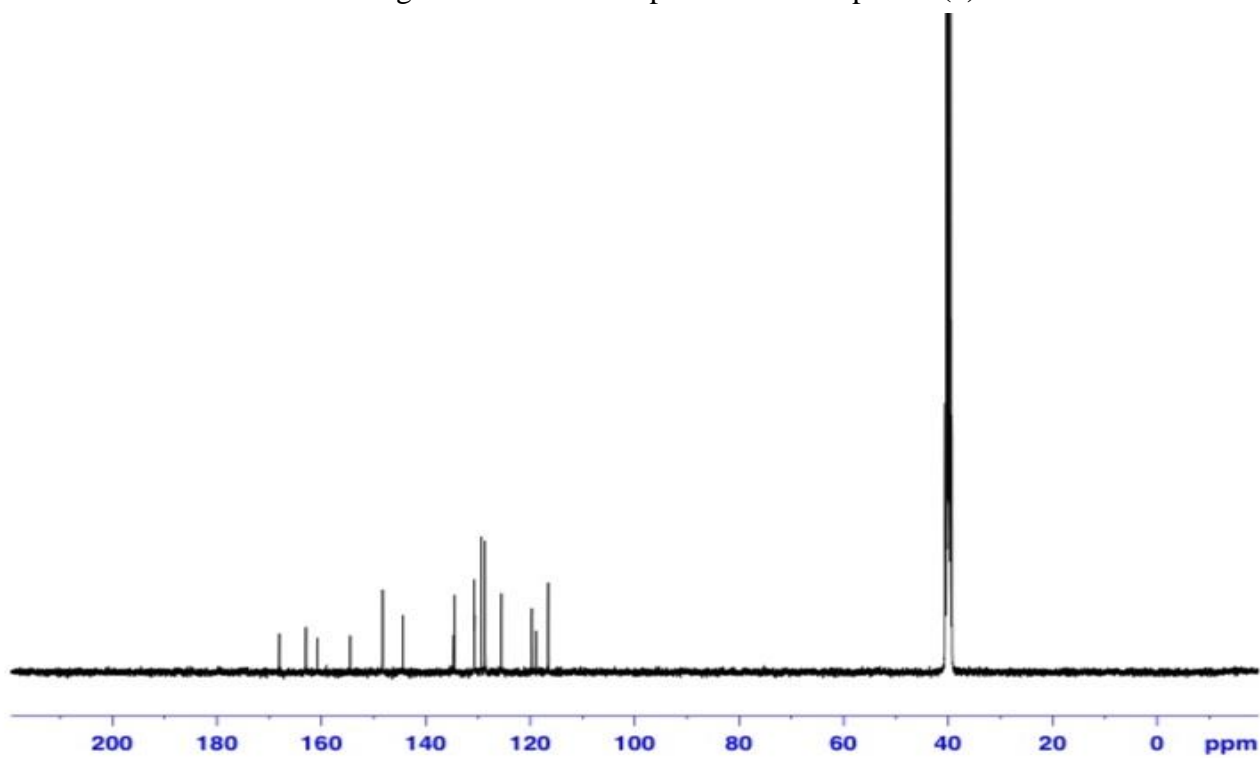

Figure S9:  $^{13}\text{C}$ -NMR spectrum of compound (6)

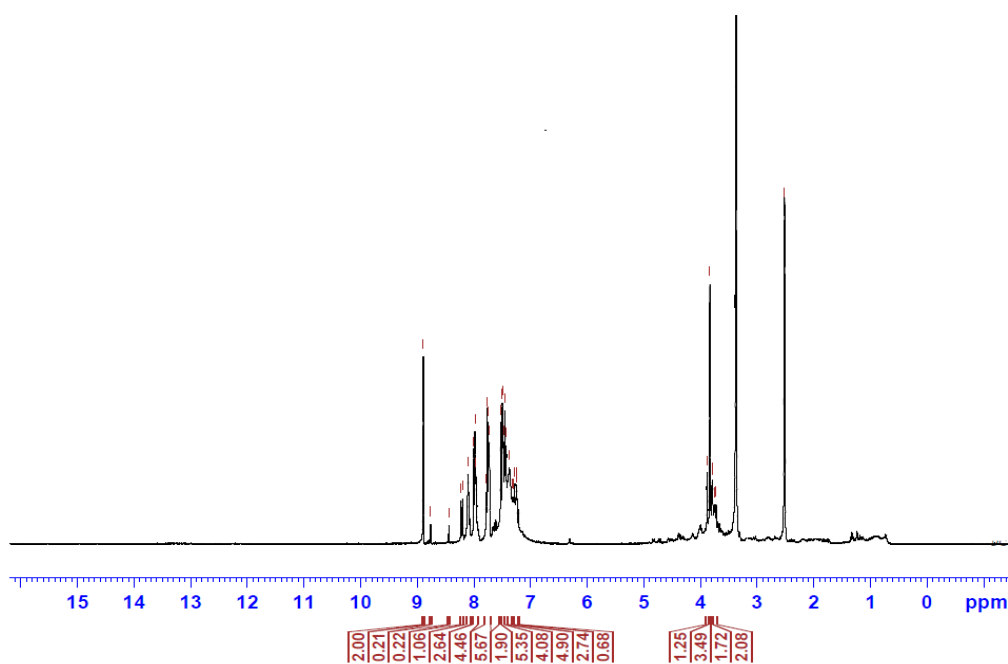

Figure S10:  $^1\text{H}$ -NMR spectrum of compound (9)

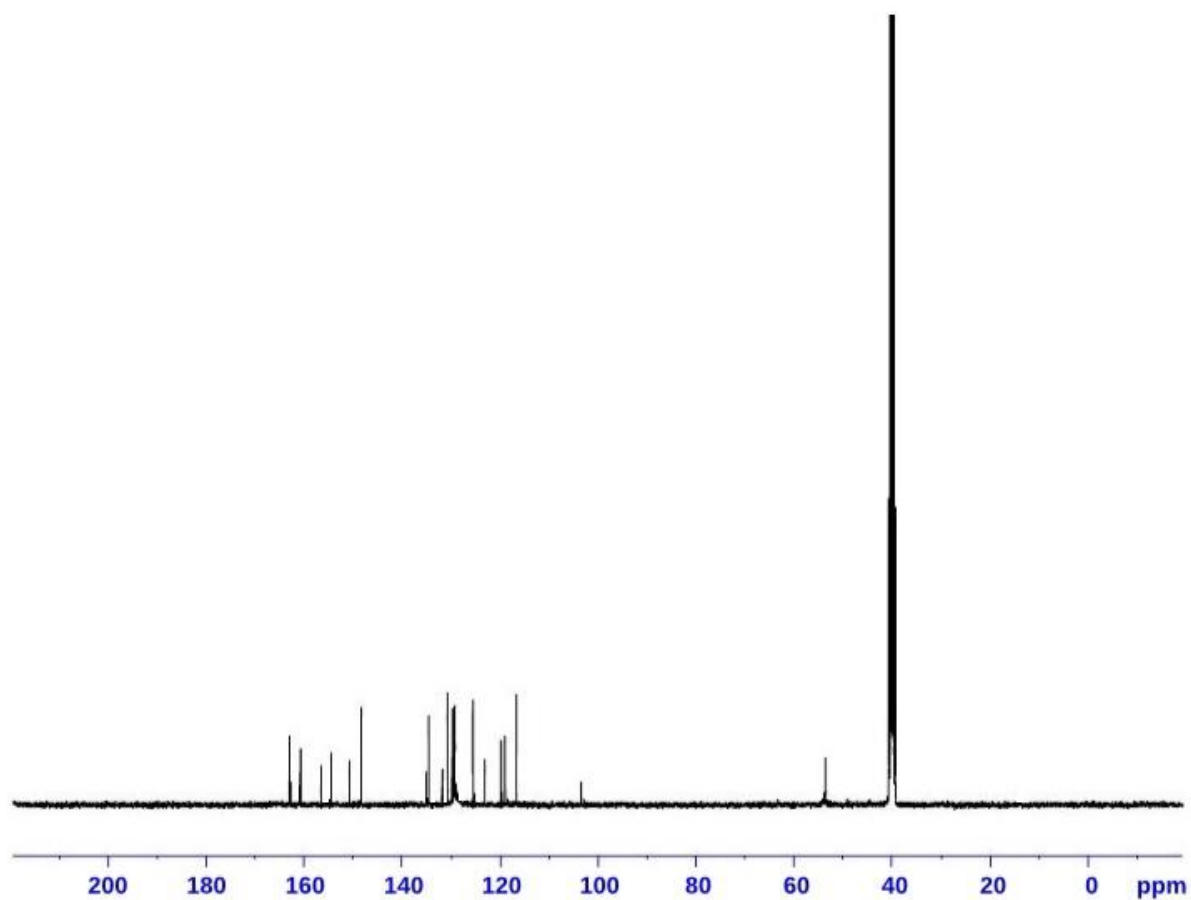

Figure S11:  $^{13}\text{C}$ -NMR spectrum of compound (9)
